# Supplementary material for: Systematic review of pharmacological therapies for the management of ischaemic pain in patients with non-reconstructable critical limb ischaemia
Source: PubMed Central journal article supplement — BMJ Support Palliat Care. 2017 Aug 23;8(4):400–10. doi: 10.1136/bmjspcare-2017-001359 (PMC6287571; doi:10.1136/bmjspcare-2017-001359), 2017-08-23

## **Appendix 1 – Final search strategy for MEDLINE (Ovid MEDLINE(R) In-Process & Other Non-Indexed Citations and Ovid MEDLINE(R) 1946 to Present)**

1. exp Pain/
2. Pain/ or Chronic Pain/
3. 1 or 2
4. critical limb ischaemia.mp.
5. Ischemia/
6. Arterial Occlusive Diseases/
7. Peripheral Vascular Diseases/
8. 4 or 5 or 6 or 7
9. 3 and 8

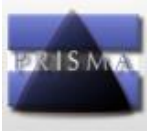

## Appendix 2

### PRISMA 2009 Flow Diagram (17)

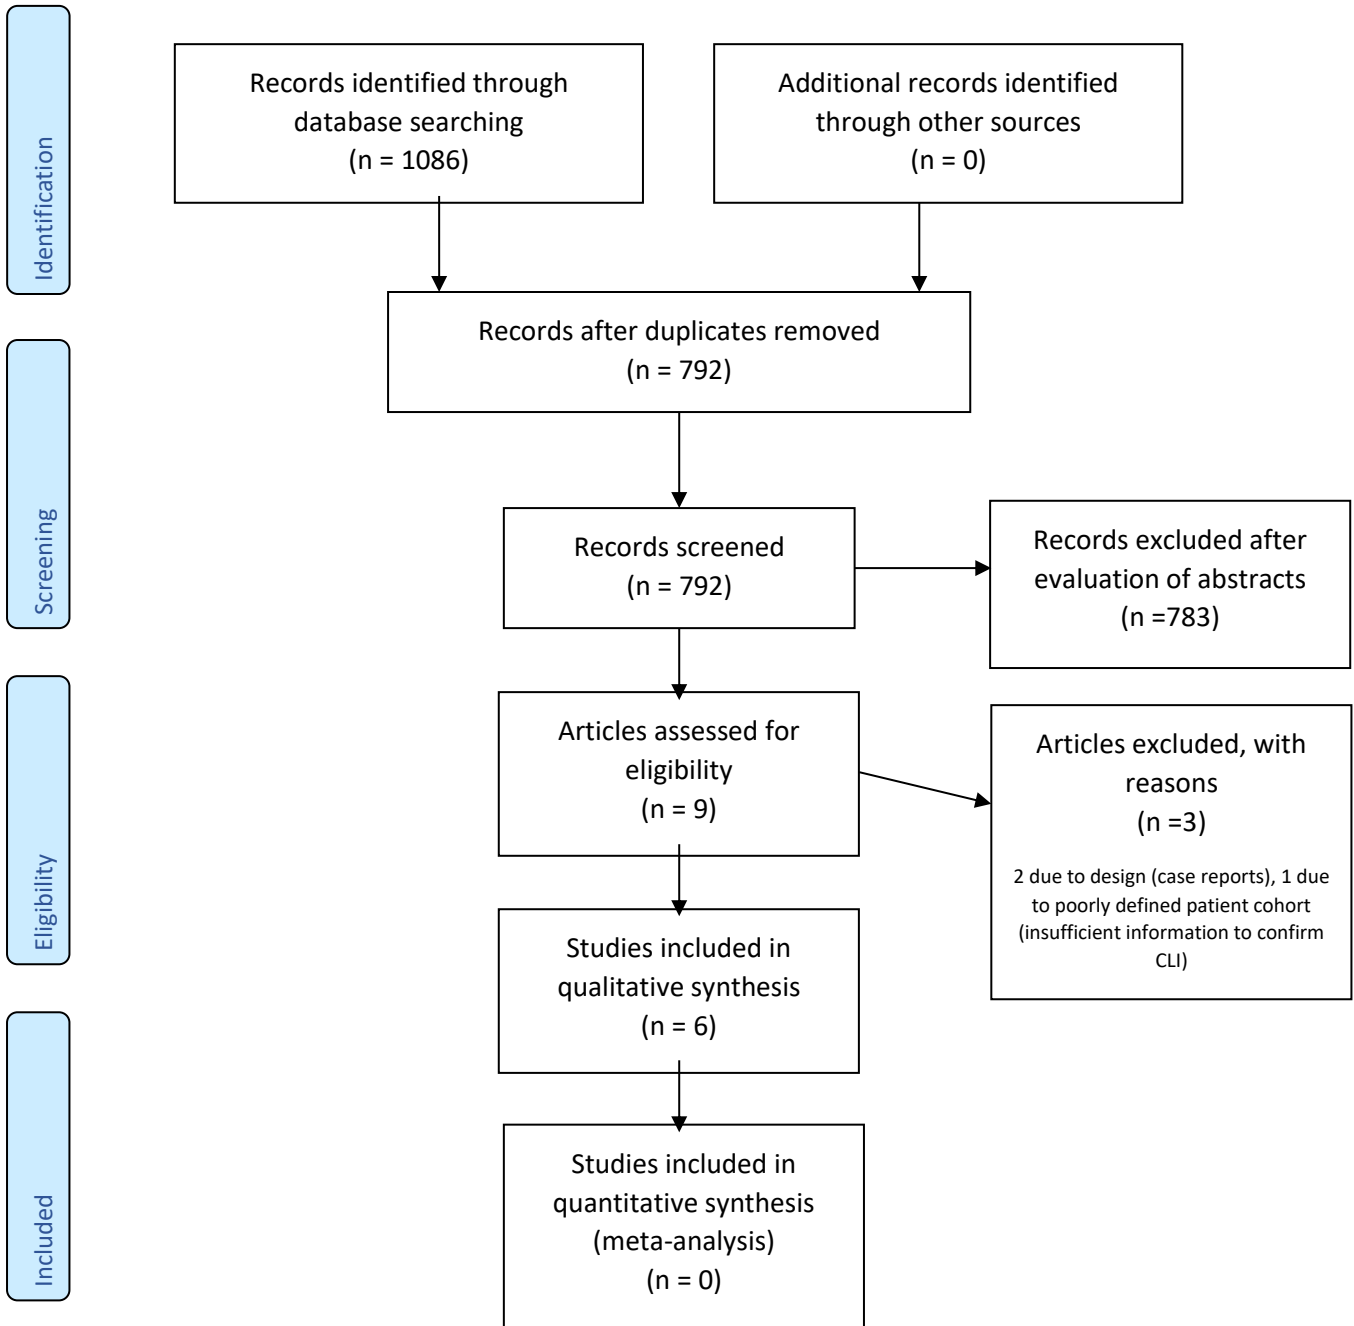

Supplement: bmjspcare-2017-001359supp001.pdf [file bmjspcare-2017-001359supp001.pdf]
